# Supplementary material
Source: Springer Nature journal article supplement (https://www.springermedizin.de/resource/supplementary/12885_2011_3660_MOESM4_ESM.pdf/9463716)

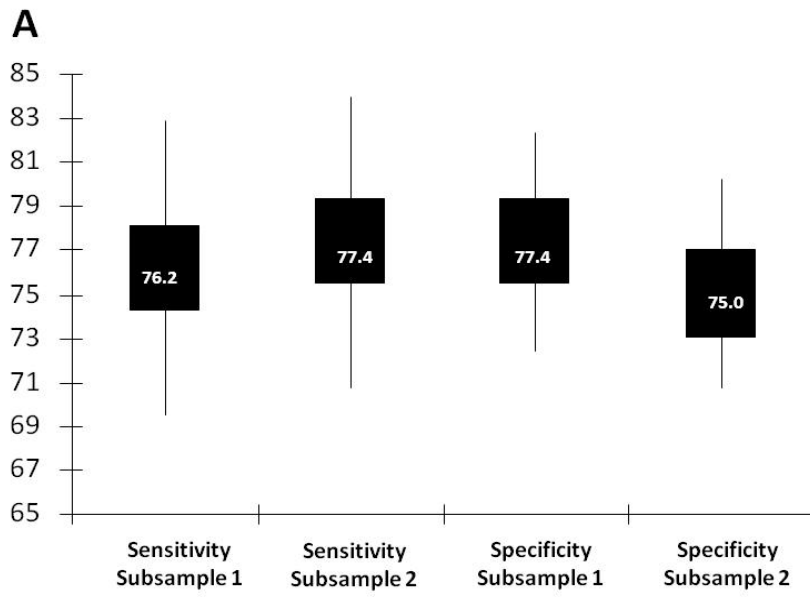

Figure 4a.

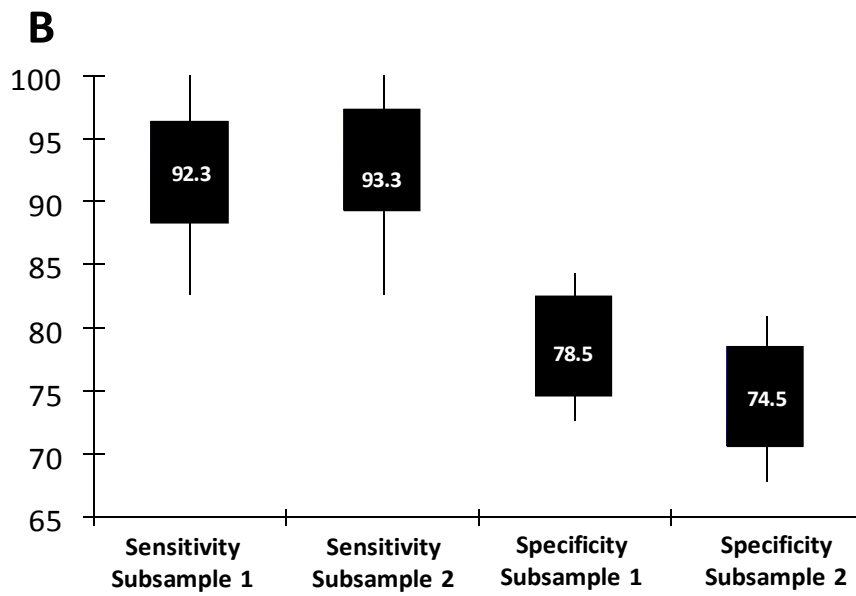

Figure 4b.

Supplement: MOESM4 [file 9463716]
